# Supplementary material for: Meat Quality and Muscle Tissue Proteome of Crossbred Bulls Finished under Feedlot Using Wet Distiller Grains By-Product
Source: MDPI journal article supplement (doi:10.3390/foods11203233), 2022-10-17
Supplement: s1 [file s1]

# Meat Quality and Muscle Tissue Proteome of Crossbred Bulls Finished under Feedlot Using Wet Distiller Grains By-product

Welder Baldassini <sup>1,4,\*</sup>, Mohammed Gagaoua <sup>2,3,\*</sup>, Bismarck Santiago <sup>4</sup>, Leone Rocha <sup>1</sup>, Juliana Torrecilhas <sup>1</sup>, Rodrigo Torres <sup>1</sup>, Rogério Curi <sup>1,4</sup>, Otávio Machado Neto <sup>1,4</sup>, Pedro Padilha <sup>5</sup>, Felipe Santos <sup>6</sup>, Dante Pazzanese Lanna <sup>7</sup> and Luis Artur Chardulo <sup>1,4</sup>

<sup>1</sup> School of Veterinary Medicine and Animal Science (FMVZ), São Paulo State University (UNESP), Botucatu 18618-681, São Paulo, Brazil

<sup>2</sup> School of Agriculture and Veterinary Sciences (FCAV), São Paulo State University (UNESP), Jaboticabal 14884-900, São Paulo, Brazil

<sup>3</sup> Food Quality and Sensory Science Department, Teagasc Food Research Centre, Ashtown, Dublin 15, D15 DY05 Dublin, Ireland

<sup>4</sup> PEGASE, INRAE, Institut Agro, 35590 Saint-Gilles, France

<sup>5</sup> Institute of Bioscience (IB), São Paulo State University (UNESP), 18618-689 Botucatu, São Paulo, Brazil

<sup>6</sup> College of Sciences and Engineering, São Paulo State University (UNESP), Tupã 17602-496, São Paulo, Brazil

<sup>7</sup> “Luiz de Queiroz” College of Agriculture (ESALQ), University of São Paulo (USP), Piracicaba 13418-900, São Paulo, Brazil

\* Correspondence: w.baldassini@unesp.br (W.B.); mohammed.gagaoua@inrae.fr or gmber2001@yahoo.fr (M.G.)

## Supplementary Data

**Table S1.** Composition of the experimental diets.

| Item                                     | Control | WDG   |
|------------------------------------------|---------|-------|
| Ingredients (g/kg of dry matter – DM)    |         |       |
| Tifton 85                                | 42      | 42    |
| Sugarcane bagasse                        | 71      | 71    |
| Ground corn                              | 749.2   | 387.3 |
| Soybean meal                             | 103.6   | 11.0  |
| Low fat corn wet distillers grains (WDG) | 0       | 450   |
| Mineral-vitamin supplement <sup>a</sup>  | 34.2    | 34.2  |
| Potassium chloride                       | 0       | 4.5   |
| Nutritional Composition (g/kg of DM)     |         |       |
| Dry Matter (g/kg as fed)                 | 867.8   | 607.2 |
| Crude Protein                            | 128.5   | 200.7 |
| Ether Extract                            | 34.2    | 35.5  |
| Neutral Detergent Fiber                  | 162.8   | 387.5 |
| Starch                                   | 482.2   | 246.9 |
| Ca: P ratio                              | 2.22    | 1.33  |

<sup>a</sup> Mineral-vitamin supplement containing: 19.5% Ca; 1.9% S; 1.5% Mg; 4.5% Na; 1.6% P; 1715 ppm Zn; 1285 ppm Mn; 428 ppm Cu; 25 ppm I; 5.7 ppm Se; 8.5 ppm Co; 286 ppm Fe; 86000 UI Vit A; 115000 UI Vit D3; 128000 UI Vit E; 0.39% Urea; 945 ppm of sodium monensin.

# CONTROL

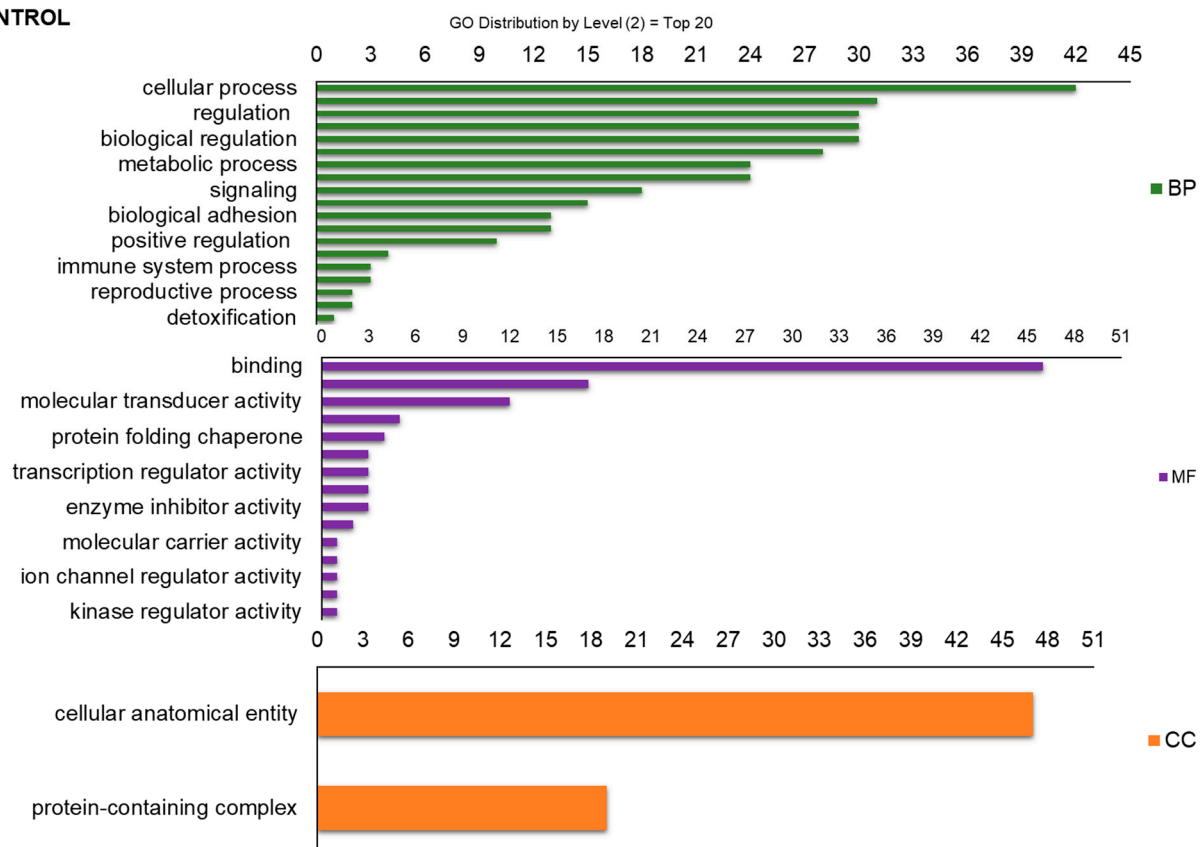

**Figure S1.** Classification of proteins identified in muscle tissue (*Longissimus thoracis*) of feedlot-finished F1 Angus-Nellore bulls fed diets without inclusion of wet corn distillers grains (control). Proteins were separated by 2D-PAGE and identified by mass spectrometry (ESI-MS/MS). The OMICSBOX software was used to classify the proteins according to biological process (BP), molecular function (MF), and cellular component (CC).

WDG

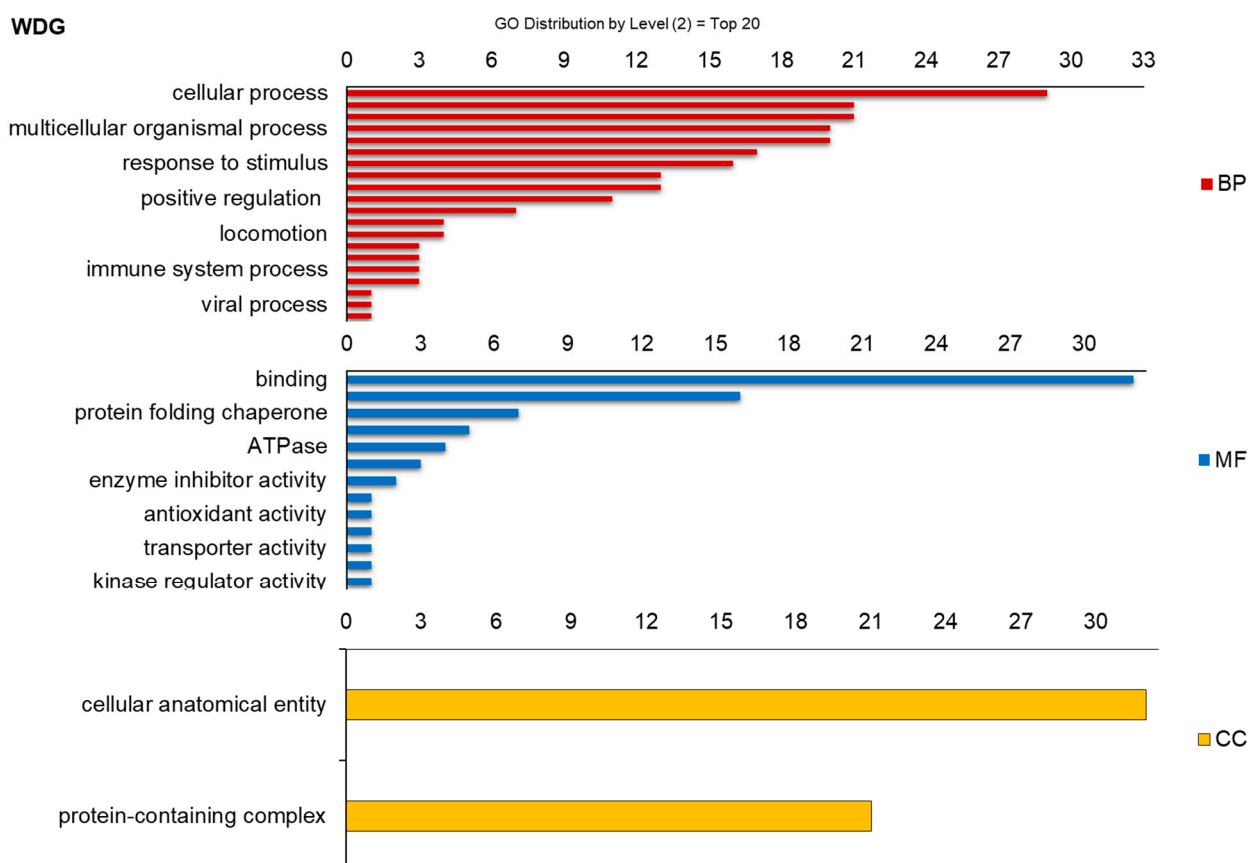

**Figure S2.** Classification of proteins identified in muscle tissue (*Longissimus thoracis*) of feedlot-finished F1 Angus-Nellore bulls fed diets with inclusion of wet corn distillers grains (WDG). Proteins were separated by 2D-PAGE and identified by mass spectrometry (ESI-MS/MS). The OMICSBOX software was used to classify the proteins according to biological process (BP), molecular function (MF), and cellular component (CC).
